# Supplementary material for: Hip Fracture Prevention in Osteoporotic Elderly and Cancer Patients: An On-Line French Survey Evaluating Current Needs
Source: PubMed Central journal article supplement (PMC7466279; doi:10.3390/medicina56080397), 2020-08-07
Supplement: medicina-56-00397-s001.pdf [file medicina-56-00397-s001.pdf]

## Supplementary material

### Elicitation questionnaire

| Section I = introduction (about the survey and the studied device)                                       |                                                                                                                                                     |
|----------------------------------------------------------------------------------------------------------|-----------------------------------------------------------------------------------------------------------------------------------------------------|
| Do you know the medical device Y-STRUT®?                                                                 | YES, already used/prescribed<br>YES, but non-used/prescribed<br>NO, never heard about it                                                            |
| How did you know about this questionnaire?                                                               | Scientific society, federation or study group<br>Journal, newspaper or newsletter<br>Direct contact by the PhD student<br>Other: specify            |
| Do you want more information about this product and/or the results of this survey?                       | YES / NO                                                                                                                                            |
| Have you already answered this survey, even incompletely?<br>(this question enables to avoid duplicates) | YES / NO                                                                                                                                            |
| Section II = about the practitioner                                                                      |                                                                                                                                                     |
| You are?                                                                                                 | A man / A woman                                                                                                                                     |
| What is your age?                                                                                        | Less than 35 years old<br>35-45 years old<br>45-55 years old<br>More than 55 years old                                                              |
| Professional experience?                                                                                 | Less than 10 years<br>10-20 years<br>20-30 years<br>More than 30 years                                                                              |
| What is your workplace in Hospital? *                                                                    | University Hospital Centre (CHU)<br>Regional University Hospital Centre (CHRU)<br>Hospital Centre (CH)<br>Private                                   |
| Where do you work? (French department)                                                                   | Selection of a French department<br>Orthopedic surgeon<br>Rheumatologist<br>Geriatrician                                                            |
| What is your specialty?                                                                                  | Interventional radiologist<br>Oncologist<br>Radiotherapist<br>Other: specify                                                                        |
| In which indication(s) are you likely to be interested in this device? *                                 | Orthopedics-traumatology indication<br>Oncological indication                                                                                       |
| Section IIIA = Orthopedics-traumatology indication                                                       |                                                                                                                                                     |
| In relation to the studied device, will you be?                                                          | User / Prescriber / Both                                                                                                                            |
| How many patients with a hip fracture due to osteoporosis do you see per month in average?               | < 5 / 5-12 / 12-20 / > 20 / NK                                                                                                                      |
| Estimated annual total?                                                                                  | < 10 / 10-20 / 20-50 / 50-100 / 100-200 / 200-300 / 300-500 / > 500 / Unknown                                                                       |
| Which type of hip fracture do you see?                                                                   | Mostly per trochanteric fractures<br>Mostly femoral neck fractures<br>Both equally<br>NK                                                            |
| What is the cause of their hip fracture?                                                                 | Mostly a simple fall from its height<br>Mostly a fall from bed<br>Mostly a fall in the stairs<br>A little bit of everything<br>Other: specify<br>NK |
| What is the history of fractures of these patients? *                                                    | 1 vertebra / Several vertebrae / Wrist / Other / NK                                                                                                 |
| How many contralateral hip fractures do you see per year in average?                                     | 0-5 / 5-10 / 10-20 / 20-50 / > 50 / NK                                                                                                              |
| Your patients suffering for hip fracture(s) are?                                                         | Mainly women<br>Mainly men<br>Both equally                                                                                                          |
| How old are these patients in majority?                                                                  | Less than 65 years old                                                                                                                              |

|                                                                                                                                         |                                                                                                                                                                                         |
|-----------------------------------------------------------------------------------------------------------------------------------------|-----------------------------------------------------------------------------------------------------------------------------------------------------------------------------------------|
|                                                                                                                                         | 65-75 years old<br>75-85 years old<br>More than 85 years old                                                                                                                            |
| Where do these patients live BEFORE contralateral hip fracture?                                                                         | Mostly at home<br>Mostly in a health care facility<br>Both equally<br>NK                                                                                                                |
| Where do these patients live AFTER contralateral hip fracture?                                                                          | Mostly at home<br>Mostly in a health care facility<br>Both equally<br>NK                                                                                                                |
| Osteoporosis diagnosed before fracture?                                                                                                 | Mostly YES / Mostly NO / Both equally / NK                                                                                                                                              |
| Medical treatment for osteoporosis before the first hip fracture?                                                                       | YES / NO / NK                                                                                                                                                                           |
| Which medical treatment is prescribed in majority?                                                                                      | Bisphosphonates / Calcium-vitamin D / Estrogen / Denosumab / THS / Teriparatide / PTH / strontium ranelate / other: specify                                                             |
| Which fixation material do you use for hip fracture treatment?                                                                          | Nail<br>Screw and plate<br>Both<br>Other: specify<br>I do not operate                                                                                                                   |
| What are the main criteria of material choice for hip fracture treatment? *                                                             | Fracture type<br>Pain<br>Stability, rehabilitation<br>Easy-to-use<br>Material availability<br>Cost<br>NK                                                                                |
| Which anesthesia is the most used for hip fracture treatment?                                                                           | Mostly general anesthesia<br>Mostly spinal anesthesia<br>Both similarly<br>Other: specify<br>NK                                                                                         |
| What is the mean surgical time (without complications) for hip fracture treatment?                                                      | < 30min / 30-60 min / > 1h / > 2h / NK                                                                                                                                                  |
| Do you prescribe a medical treatment for osteoporosis after the first hip fracture?                                                     | Mostly YES<br>Mostly NO<br>I am not a prescriber                                                                                                                                        |
| What is the mean life expectancy for patients after the FIRST hip fracture with the usual medical/surgical treatment?                   | < 1 month<br>< 6 months<br>< 12 months<br>> 12 months<br>NK                                                                                                                             |
| How many deaths per year do you estimate at 1 year after the FIRST hip fracture with the usual medical/surgical treatment?              | 0-5 / 5-10 / 10-15 / 15-20 / > 20 / NK                                                                                                                                                  |
| What is the mean life expectancy for patients after the SECOND hip fracture (contralateral) with the usual medical/surgical treatment?  | < 1 month<br>< 6 months<br>< 12 months<br>> 12 months<br>NK                                                                                                                             |
| How many deaths per year do you estimate at 1 year after the SECOND hip fracture with the usual medical/surgical treatment?             | 0-5 / 5-10 / 10-15 / 15-20 / > 20 / NK                                                                                                                                                  |
| What reduction in the risk of contralateral fracture at 1 year would lead you to use this new implantable medical device in prevention? | 30% / 50% / 70% / 90% / NK                                                                                                                                                              |
| Which benefit(s) would lead you to use/prescribe this new device? *                                                                     | Refracture rate at 1 year<br>Life expectancy at 1 year<br>Quality of life<br>Comorbidities<br>Patient's dependency<br>I do not see benefit, I will not use/prescribe it                 |
| Which risk(s) would lead you to not use/prescribe this new device? *                                                                    | Surgical risk<br>Not enough clinical experience<br>I think that the benefits-to-risks ratio is unfavorable<br>Other: specify<br>I do not see major risk, this device is a good solution |

|                                                                                                                                           |                                                                                                                                                                                                                                                                                                                                                                                     |
|-------------------------------------------------------------------------------------------------------------------------------------------|-------------------------------------------------------------------------------------------------------------------------------------------------------------------------------------------------------------------------------------------------------------------------------------------------------------------------------------------------------------------------------------|
| What would be your prevention strategy of the contralateral hip with this new implantable medical device?                                 | Simultaneously with the 1st fracture treatment<br>Postponed<br>No prevention<br>NK<br>Before hospital exit<br>At the 1-month visit<br>At the 3-month visit<br>After 6 months                                                                                                                                                                                                        |
| Post-poned prevention strategy?                                                                                                           |                                                                                                                                                                                                                                                                                                                                                                                     |
| Will you be willing to use/prescribe this new implantable medical device in prevention?                                                   | YES / NO / NK                                                                                                                                                                                                                                                                                                                                                                       |
| Are you satisfied by the questionnaire?                                                                                                   | (scale) 100: absolutely, 0: not satisfied at all                                                                                                                                                                                                                                                                                                                                    |
| <b>Section IIIB = Oncology indication</b>                                                                                                 |                                                                                                                                                                                                                                                                                                                                                                                     |
| In relation to the studied device, will you be?                                                                                           | User / Prescriber / Both                                                                                                                                                                                                                                                                                                                                                            |
| How many patients with metastatic pre-fractural lesions at the proximal femur do you see per month in average?<br>Estimated annual total? | < 5 / 5-12 / 12-20 / > 20 / NK<br>< 10 / 10-20 / 20-50 / 50-100 / 100-200 / 200-300 / 300-500 / > 500 / NK                                                                                                                                                                                                                                                                          |
| Which type of lesions do you see at the proximal femur in majority?                                                                       | Lesion at the femoral head<br>Lesion at the femoral neck<br>Per trochanteric lesion<br>Lesion at the diaphysis<br>All locations equally<br>NK                                                                                                                                                                                                                                       |
| How many hip fractures linked to these lesions do you see per year in average?                                                            | < 10 / 10-20 / 20-50 / 50-100 / 100-200 / 200-300 / 300-500 / > 500 / NK                                                                                                                                                                                                                                                                                                            |
| What is the mean life expectancy for patients after a hip fracture with the usual medical/surgical treatment?                             | < 1 month<br>< 6 months<br>< 12 months<br>> 12 months<br>NK                                                                                                                                                                                                                                                                                                                         |
| How many deaths per year do you estimate at 1 year after a hip fracture with the usual medical/surgical treatment?                        | 0-5 / 5-10 / 10-15 / 15-20 / > 20 / NK                                                                                                                                                                                                                                                                                                                                              |
| In accordance to the ECOG score, how do you classify the patients suffering from lesions at the proximal femur?                           | 1: Mostly fully active<br>2: Mostly restrained in physical activities, but outpatient, professional activity or at home ok<br>3: Mostly outpatient, autonomous but without professional activities or at home<br>4: Mostly poor, assisted/bedridden more than 50% of the day<br>5: Mostly disabled, permanently assisted/ bedridden, with assistance<br>All proposals equally<br>NK |
| Medical treatment for osteolytic metastasis pre-fractural lesions at the proximal femur?                                                  | YES / NO / NK                                                                                                                                                                                                                                                                                                                                                                       |
| Which medical treatment is prescribed in majority?                                                                                        | Chemotherapy<br>Local radiotherapy<br>Chemotherapy + local radiotherapy<br>Other: specify<br>Embolization<br>Ablation (radiofrequency or cryotherapy)                                                                                                                                                                                                                               |
| Which local treatment is often associated? *                                                                                              | Radiotherapy<br>Other: specify<br>No treatment<br>NK                                                                                                                                                                                                                                                                                                                                |
| Which type of primary cancer is associated to osteolytic metastasis at the proximal femur in majority? *                                  | Lung / Breast / Prostate / Kidney / Melanoma<br>Other: specify / NK<br>Mainly NO                                                                                                                                                                                                                                                                                                    |
| Do you propose to these patients a preventive treatment for proximal femur fracture?                                                      | Mainly YES, addressed to the orthopedics service<br>Mainly YES, addressed to a multidisciplinary meeting<br>Other: specify                                                                                                                                                                                                                                                          |
| What is the main decision criterium for proximal femur fracture prevention?                                                               | Mirels' score / Pain / ECOG / Other: specify / NK                                                                                                                                                                                                                                                                                                                                   |
| About the Mirels' score1                                                                                                                  | Choice between 3 and 12                                                                                                                                                                                                                                                                                                                                                             |
| About the pain                                                                                                                            | Choice between 1 and 10                                                                                                                                                                                                                                                                                                                                                             |
| About the ECOG score                                                                                                                      | Choice between 1 and 5                                                                                                                                                                                                                                                                                                                                                              |

|                                                                                              |                                                                                                                                                                                                                                                                                                                                 |
|----------------------------------------------------------------------------------------------|---------------------------------------------------------------------------------------------------------------------------------------------------------------------------------------------------------------------------------------------------------------------------------------------------------------------------------|
| Which preventive treatment do you propose, in majority, against proximal femur fracture?     | Osteosynthesis in the orthopedics service<br>Screwing + cementoplasty<br>Cementoplasty alone<br>I do not do prevention<br>Other: specify<br>Size of the lesion<br>Pain<br>Easy-to-use<br>Material availability<br>Cost<br>NK<br>Mostly general anesthesia<br>Mostly spinal anesthesia<br>Both similarly<br>Other: specify<br>NK |
| What is(are) the main criterium(a) of choice for proximal hip fracture prevention?           | In the orthopedics operative room (OR)<br>In the interventional radiology OR                                                                                                                                                                                                                                                    |
| Which anesthesia is the most used for proximal hip fracture prevention?                      | < 30min / 30-60 min / > 1h / > 2h / NK                                                                                                                                                                                                                                                                                          |
| Where is done the preventive treatment in majority?                                          | Refracture rate at 1 year<br>Life expectancy at 1 year<br>Quality of life<br>Comorbidities<br>Patient's dependency                                                                                                                                                                                                              |
| What is the mean surgical time (without complications) for proximal hip fracture prevention? | I do not see benefit; I will not use/prescribe it<br>Surgical risk<br>Not enough clinical experience                                                                                                                                                                                                                            |
| Which benefit(s) would lead you to use/prescribe this new device? *                          | I think that the benefits-to-risks ratio is unfavorable<br>Other: specify                                                                                                                                                                                                                                                       |
| Which risk(s) would lead you to use/prescribe this new device? *                             | I do not see major risk; this device is a good solution                                                                                                                                                                                                                                                                         |
| Will you be willing to use/prescribe this new implantable medical device in prevention?      | YES / NO / NK                                                                                                                                                                                                                                                                                                                   |
| Are you satisfied by the questionnaire?                                                      | (scale) 100: absolutely, 0: not satisfied at all                                                                                                                                                                                                                                                                                |

\* several responses possible; NK=unknown; <sup>1</sup> Mirels classification- Metastatic disease in long bones and impending pathologic fracture - Jawad et al. 2010 [1]

1. Jawad, M.U.; Scully S.P. In brief : Classifications in brief: Mirels' classification: Metastatic disease in long bones and impending pathologic fracture. *Clin. Orthop. Relat. Res.* **2010**, *468*, 2825–2827.
